# Supplementary material
Source: PubMed Central journal article supplement (PMC7324493)

**Supporting Information for: Structural Basis for the Hydrolytic  
Dehalogenation of the Fungicide Chlorothalonil**

Daniel S. Catlin<sup>3‡</sup>, Xinhang Yang<sup>1‡</sup>, Brian Bennett<sup>2</sup>, Richard C. Holz<sup>1,4\*</sup>, and Dali Liu<sup>3\*</sup>

<sup>1</sup>*Department of Chemistry, Marquette University, PO Box 1881, Milwaukee, Wisconsin 53201-1881,* <sup>2</sup>*Department of Physics, Marquette University, 1420 W. Clybourn St., Milwaukee, Wisconsin 53233, the* <sup>3</sup>*Department of Chemistry and Biochemistry, Loyola University Chicago, 1068 W. Sheridan Rd., Chicago, IL 60626, and the* <sup>4</sup>*Department of Chemistry, Colorado School of Mines, Golden, Colorado 80401*

**Figure S11.** Size exclusion gel filtration chromatography curves of truncated Chd (solid line) and Chd mutant (dash line) by 50 mM HEPES buffer at pH 7 indicating both are homodimers in solution.

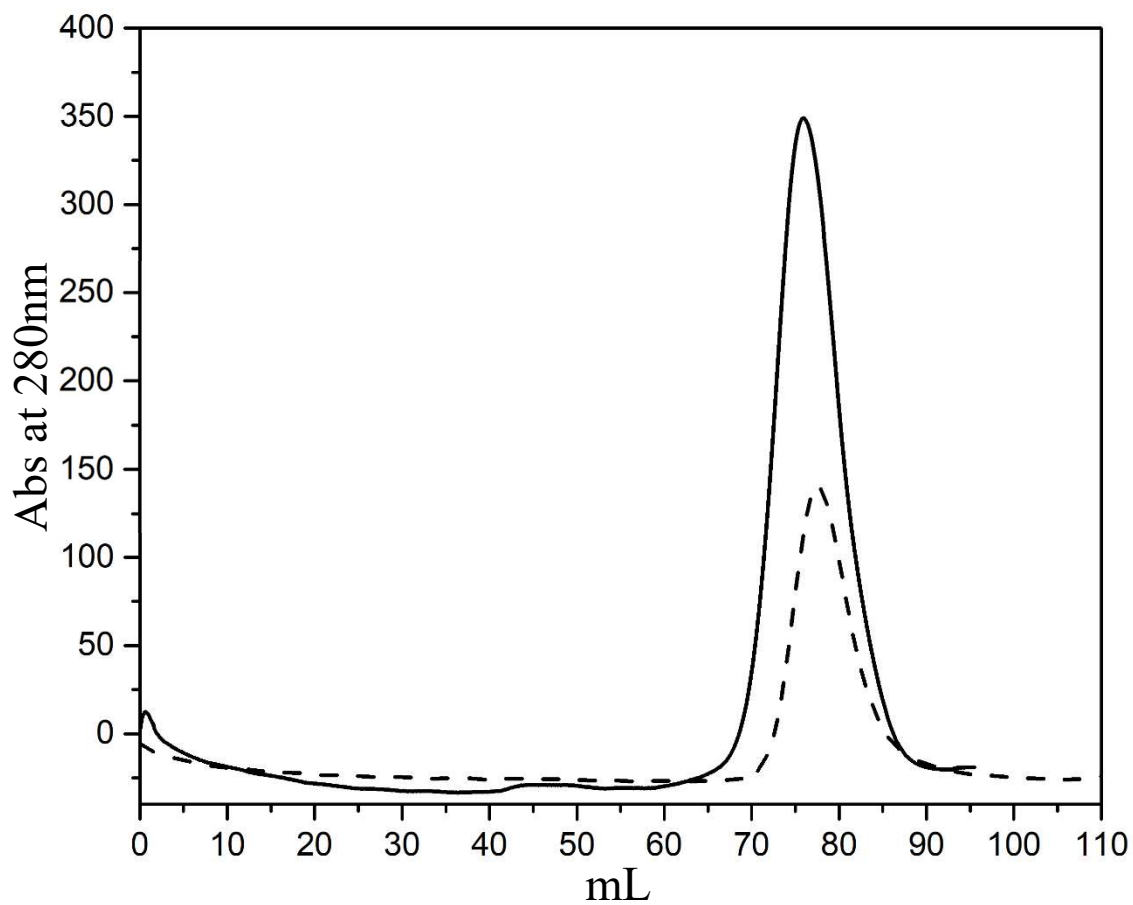

Supplement: supp_RA120.013150_158994_2_supp_521324_q9k2s5.pdf [file supp_RA120.013150_158994_2_supp_521324_q9k2s5.pdf]
